# Supplementary material for: A High-Content, Phenotypic Screen Identifies Fluorouridine as an Inhibitor of Pyoverdine Biosynthesis and Pseudomonas aeruginosa Virulence
Source: PubMed Central journal article supplement (PMC4999921; doi:10.1128/msphere.00217-16), 2016-08-24
Supplement: sph004162135sf2.pdf [file sph004162135sf2.pdf]

A

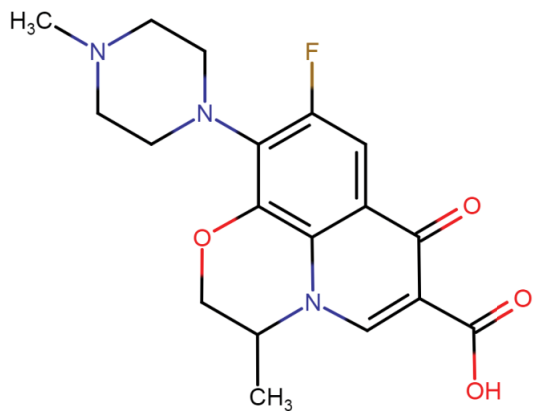

Ofloxacin

B

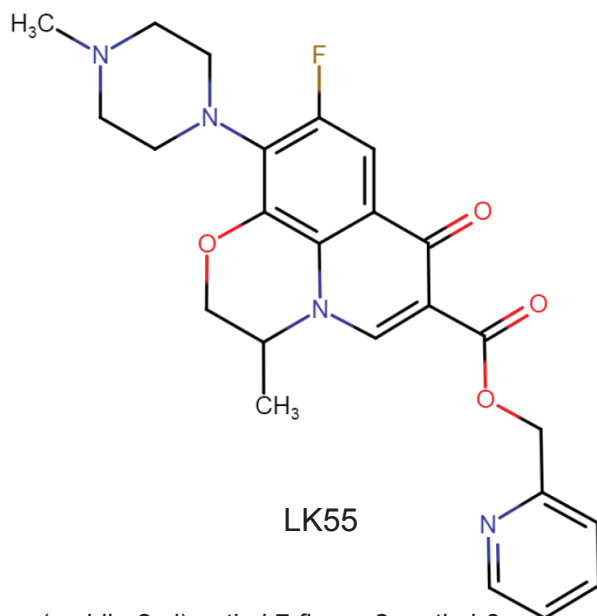

LK55

(pyridin-2-yl)methyl 7-fluoro-2-methyl-6-(4-methylpiperazin-1-yl)-10-oxo-4-oxa-1-azatricyclo[7.3.1.0<sup>5,13</sup>]trideca-5(13),6,8,11-tetraene-11-carboxylate

C

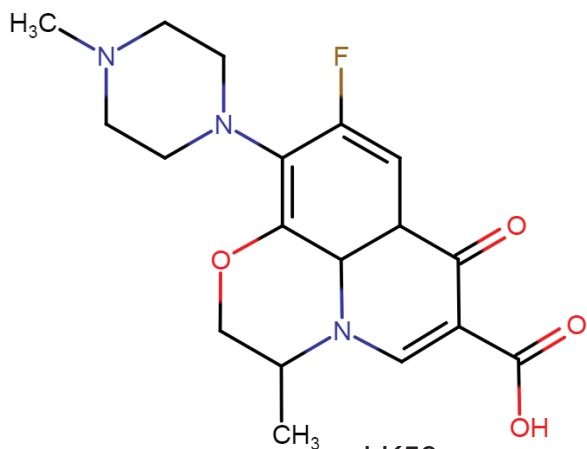

LK59

7-fluoro-2-methyl-6-(4-methylpiperazin-1-yl)-10-oxo-4-oxa-1-azatricyclo[7.3.1.0<sup>5,13</sup>]trideca-5,7,11-triene-11-carboxylic acid

D

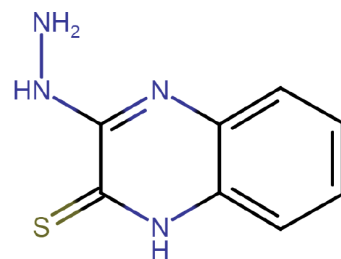

LK10

3-hydrazinoquinoxaline-2-thiol
