# Supplementary material for: A High-Content, Phenotypic Screen Identifies Fluorouridine as an Inhibitor of Pyoverdine Biosynthesis and Pseudomonas aeruginosa Virulence
Source: PubMed Central journal article supplement (PMC4999921; doi:10.1128/msphere.00217-16), 2016-08-24
Supplement: sph004162135sf4.pdf [file sph004162135sf4.pdf]

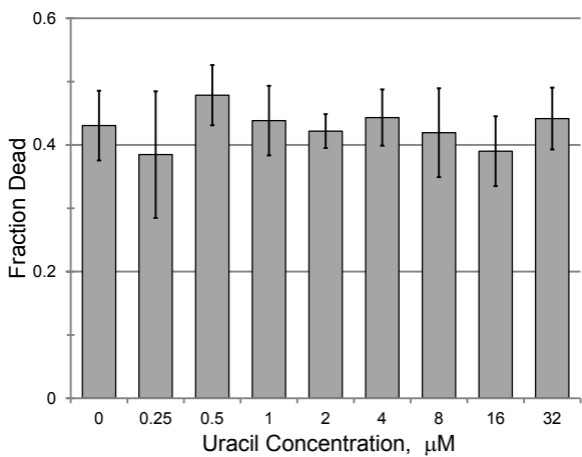

Figure S4
